# Supplementary material for: Desmosterolosis: an illustration of diagnostic ambiguity of cholesterol synthesis disorders
Source: PubMed Central journal article supplement (PMC4076431; doi:10.1186/1750-1172-9-94), 2014-06-25

Supplementary figure (.pdf).

**Molecular confirmation of Desmosterolosis through exome sequencing and Sanger sequencing**

NextGene (Softgenetics, Pennsylvania) view of the exome sequencing reads for one affected child (A) and dideoxy nucleotide sequencing validation (B) for the mother, father, and both affected children. The mother and father were heterozygous for NM\_014762.3:c.571G>A (p.E191K) mutation. The propositae have the mutation in homozygosity.

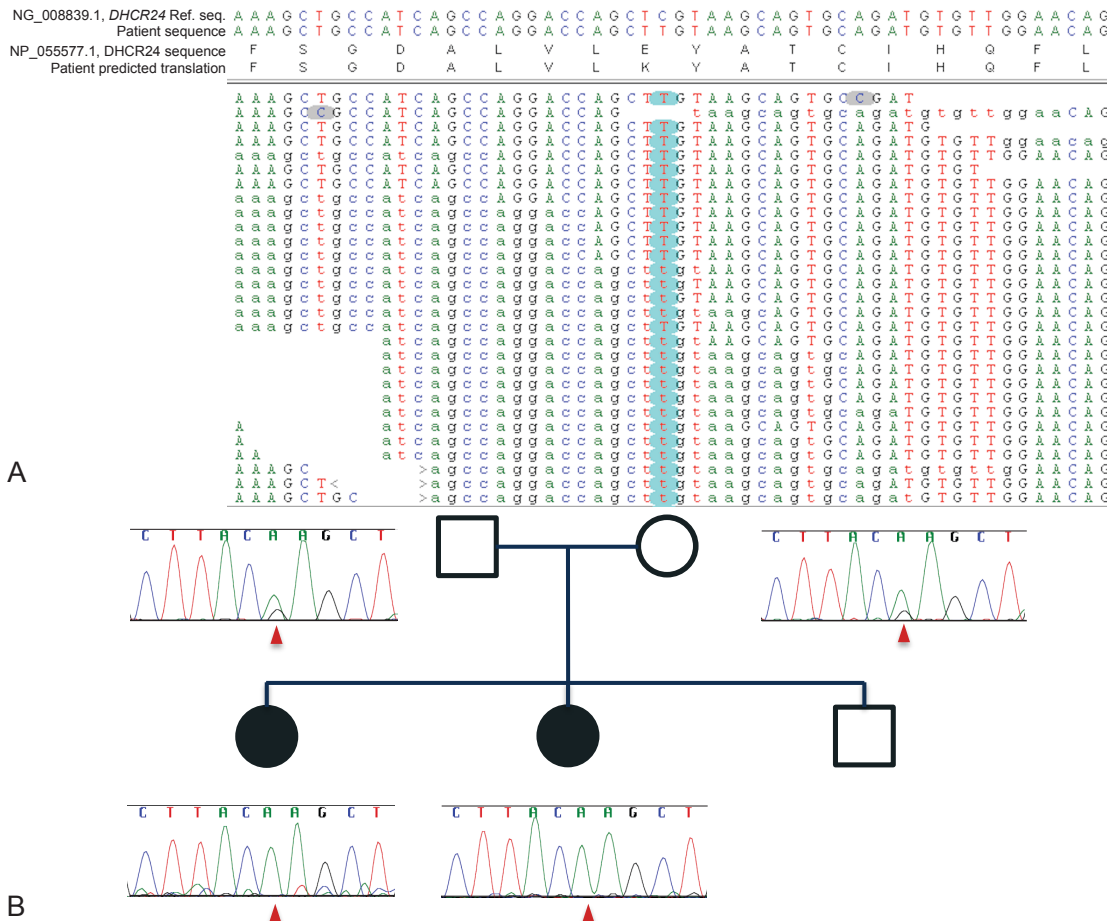

Supplement: 1750-1172-9-94-S2.pdf [file 1750-1172-9-94-S2.pdf]
